# Supplementary material
Source: PubMed Central journal article supplement (PMC4000087)
Supplement: embj0033-0686-sd1.pdf [file embj0033-0686-sd1.pdf]

## SUPPLEMENTARY MATERIAL

Calzolari, Terriente and Pujades, EMBOJ-2013-86003

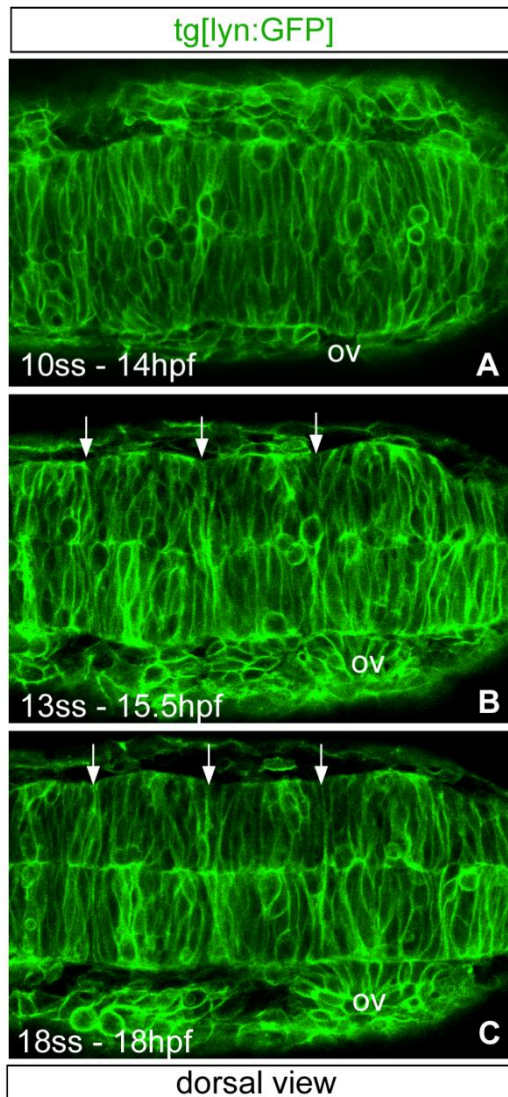

**Figure S4:** In vivo imaging of wt embryos injected with *lyn*:GFP mRNA at 1-2cell/stage. Time-lapse frames at 14hpf, 15.5hpf and 18hpf. Note that the morphological rhombomeric boundaries are clearly visible from 15.5hpf onwards (see white arrows pointing to the indentations of the neural tube). Dorsal views with anterior to the left.
