# Supplementary material
Source: PubMed Central journal article supplement (PMC4000087)
Supplement: embj0033-0686-sd4.pdf [file embj0033-0686-sd4.pdf]

**SUPPLEMENTARY MATERIAL**

Calzolari, Terriente and Pujades, EMBOJ-2013-86003

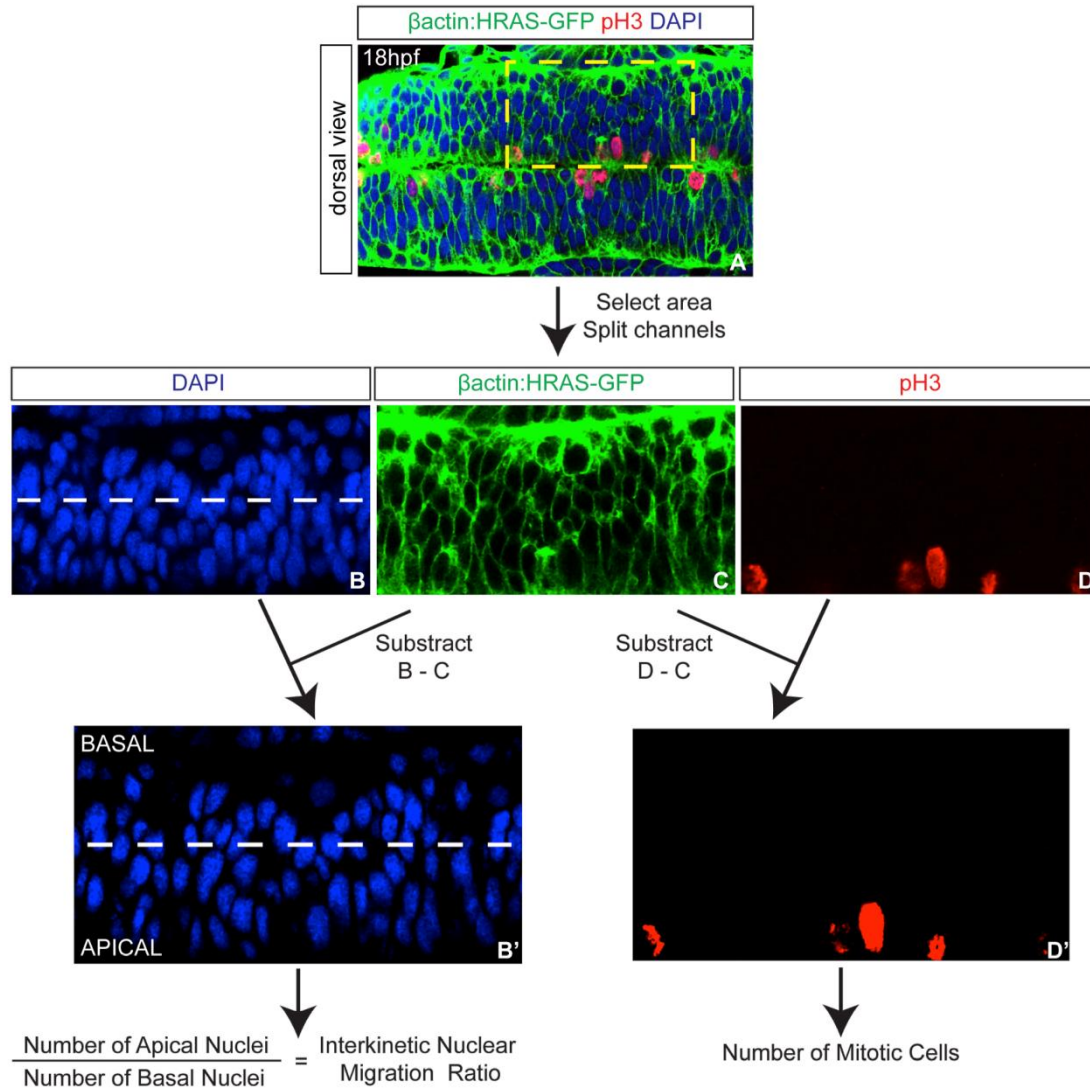

**Figure S8:** Summary to show the processing of samples for the quantification of the Interkinetic Nuclear Migration Ratio and the number and position of mitotic cells. Tg[ $\beta\text{actin:HRAS-GFP}$ ] embryos were stained for anti-pH3 (red) and DAPI (blue) at 18hpf. To clearly singularize the cell nuclei, the intensity of GFP labeling the plasma membrane (C) was subtracted from the DAPI staining in blue channel (B) and the mitotic cells in red channel (D). Then, either nuclei (DAPI-staining) or pH3-positive cells were counted in the desired regions. (B-D; B',D') correspond to the insert framed in (A).
