# Supplementary material
Source: PubMed Central journal article supplement (PMC4000087)
Supplement: embj0033-0686-sd5.pdf [file embj0033-0686-sd5.pdf]

## SUPPLEMENTARY MATERIAL

Calzolari, Terriente and Pujades, EMBOJ-2013-86003

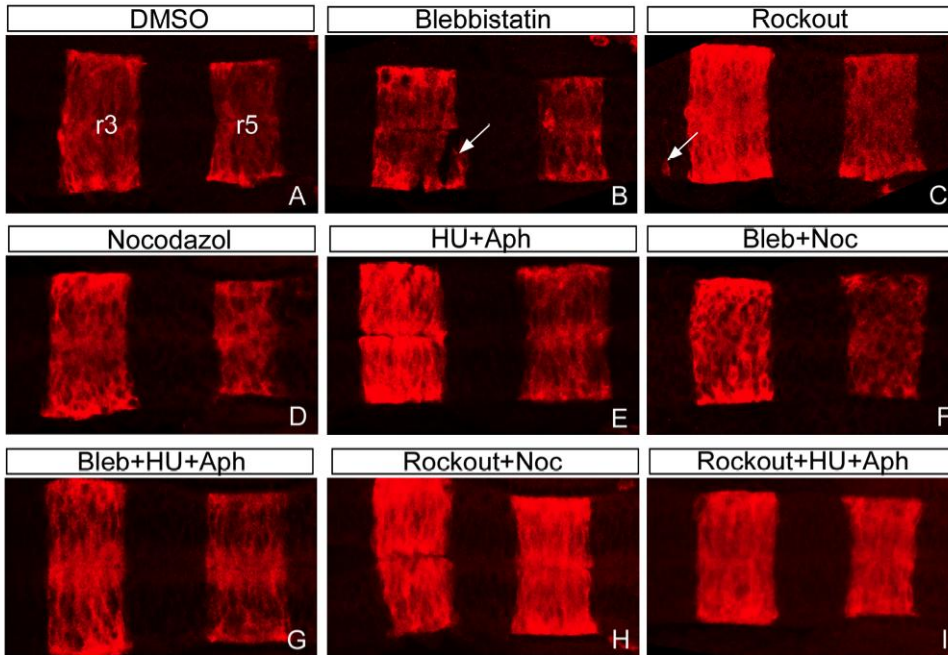

| J Treatment    | Ectopic cells |
|----------------|---------------|
| DMSO           | 1/9 = 11%     |
| Bleb           | 7/12 = 58%    |
| Rockout        | 7/11 = 63%    |
| Nocodazol      | 1/10 = 10%    |
| HU+Aph         | 1/10 = 10%    |
| Bleb+Noc       | 2/15 = 13%    |
| Bleb+HU+Aph    | 2/14 = 14%    |
| Rockout+Noc    | 1/17 = 6%     |
| Rockout+HU+Aph | 4/15 = 26%    |

**Figure S9:** Analysis of rhombomeric cell intermingling after different pharmacological treatments. Mü4127 embryos at 14hpf were treated with: DMSO (A), inhibitors of the function of myosin II, such as Blebbistatin (B) and Rockout (C), pharmacological agents that affect cell proliferation either inducing mitotic arrest such as Nocodazole (E), or blocking the cell cycle in S-phase such as Hydroxyurea (HU) or Aphidicolin (Aph). (F-I) Embryos treated with combinations of different agents. Note that cell sorting is restored when cell division is inhibited in Blebbistatin- or Rockout-treated embryos (F-I). Dorsal views with anterior to the left. White arrows indicate ectopic rhombomeric cells. (J) Table summarizing the results obtained with different treatments and combinations.
